# Supplementary material
Source: MDPI journal article supplement (https://www.mdpi.com/2071-1050/13/18/10286)
Supplement: s1 [file s1 › sustainability-1314710-supplementary.pdf]

## Supplementary Information

**Table S1.** Nomenclature table

| Abbreviation     | Name                                                      |
|------------------|-----------------------------------------------------------|
| ACEA             | European Automotive Manufacturer Association              |
| AoP              | Areas of Protection                                       |
| B2S              | Business to Society                                       |
| BMW              | Bayrische Motoren Werke AG                                |
| CO <sub>2e</sub> | carbon dioxide equivalent                                 |
| CS               | Corporate Sustainability                                  |
| CSR              | Corporate Social Responsibility                           |
| DALY             | Disability-Adjusted Life Years                            |
| E-LCA            | Environmental Life Cycle Assessment                       |
| E-LCI            | Environmental Life Cycle Inventory                        |
| FU               | Functional Unit                                           |
| GaBi             | Ganzheitliche Bilanzierung                                |
| IE               | Industrial Ecology                                        |
| ISO              | International Standardization Organization                |
| LCA              | Life Cycle Assessment                                     |
| LCC              | Life Cycle Costing                                        |
| LCSA             | Life Cycle Sustainability Assessments                     |
| LCT              | Life Cycle Thinking                                       |
| LCWE             | Life Cycle Working Environment                            |
| MCDA             | Multi-Criteria Decision Analysis                          |
| MDG              | Millennium Development Goals                              |
| NGO              | Non-governmental Organization                             |
| PDCA             | Plan-Do-Check-Act                                         |
| PEF              | Product Environmental Footprint                           |
| PRP              | Performance Reference Points                              |
| PSI              | Product Sustainability Index                              |
| PSIA             | Handbook for Product Social Impact Assessments            |
| PSILCA           | Database for Product Social Impact Life Cycle Assessments |
| QDA              | Qualitative Data Analysis                                 |
| SAM              | Subcategory Assessment Method                             |
| SDG              | Sustainable Development Goals                             |
| SELCA            | Social and Environmental Life Cycle Assessment            |
| S-OLCA           | Social Organizational Life Cycle Assessment               |
| SET              | Social Exchange Theory                                    |
| SETAC            | Society of Environmental Toxicology and Chemistry         |
| SHDB             | Social Hotspot Database                                   |

|        |                                      |
|--------|--------------------------------------|
| S-LCA  | Social Life Cycle Assessment         |
| S-LCIA | Social Life Cycle Impact Assessment  |
| ToC    | Theory of Change                     |
| UNEP   | United Nations Environment Programme |

**Table S2.** List of analyzed publications from 2015-2020

| Ref. | Authors                | Year | Approach                  | Title                                                                                                                                                         |
|------|------------------------|------|---------------------------|---------------------------------------------------------------------------------------------------------------------------------------------------------------|
| [1]  | Baumann et al.         | 2013 | Empirical                 | Does the Production of an Airbag Injure more People than the Airbag Saves in Traffic?                                                                         |
| [2]  | Chhipi-Shrestha et al. | 2015 | Theoretical               | ‘Socializing’ sustainability: a critical review on current development status of social life cycle impact assessment method                                   |
| [3]  | Martínez-Blanco et al. | 2015 | Analytical                | Social organizational LCA (SOLCA)—a new approach for implementing social LCA                                                                                  |
| [4]  | Ren et al.             | 2015 | Analytical<br>+ empirical | Prioritization of bioethanol production pathways in China based on life cycle sustainability assessment and multicriteria decision-making                     |
| [5]  | Umair et al.           | 2015 | Empirical                 | Social impact assessment of informal recycling of electronic ICT waste in Pakistan using UNEP SETAC guidelines                                                |
| [6]  | Karklina et al.        | 2015 | Empirical                 | Social life cycle assessment of biomethane production and distribution in Latvia                                                                              |
| [7]  | Luca et al.            | 2015 | Analytical<br>+ empirical | Social Life Cycle Assessment and Participatory Approaches: A Methodological Proposal Applied to Citrus Farming in Southern Italy                              |
| [8]  | Dong and Ng            | 2015 | Analytical<br>+ empirical | A social life cycle assessment model for building construction in Hong Kong                                                                                   |
| [9]  | Mattioda et al.        | 2015 | Theoretical               | Determining the principal references of the social life cycle assessment of products                                                                          |
| [10] | Di Cesare et al.       | 2015 | Theoretical               | Positive impacts and Indicator Categories in Social Life Cycle Assessment. Results from a systematic review                                                   |
| [11] | Dewulf et al.          | 2015 | Analytical                | Toward an Overall Analytical Framework for the Integrated Sustainability Assessment of the Production and Supply of Raw Materials and Primary Energy Carriers |
| [12] | Bocoum et al.          | 2015 | Analytical<br>+ empirical | Anticipating impacts on health based on changes in income inequality caused by life cycles                                                                    |

|      |                               |      |                           |                                                                                                                              |
|------|-------------------------------|------|---------------------------|------------------------------------------------------------------------------------------------------------------------------|
| [13] | Kim et al.                    | 2015 | Analytical<br>+ empirical | Evaluating the perceived social impacts of hosting large-scale sport tourism events: Scale development and validation        |
| [14] | Musaazi et al.                | 2015 | Empirical                 | Quantification of social equity in life cycle assessment for increased sustainable production of sanitary products in Uganda |
| [15] | Dunmade et al.                | 2016 | Empirical                 | A Social Lifecycle Assessment Model for Sachet Water Production in Nigeria                                                   |
| [16] | Barros Telles do Carmo et al. | 2016 | Analytical<br>+ empirical | Social impacts profile of suppliers: a S-LCA approach                                                                        |
| [17] | Thorstensen and Forsberg      | 2016 | Theoretical               | Social Life Cycle Assessment as a resource for Responsible Research and Innovation                                           |
| [18] | Wang et al.                   | 2016 | Analytical                | An analytic framework for social life cycle impact assessment—part 1: methodology                                            |
| [19] | Karlewski                     | 2016 | Analytical<br>+ empirical | Social Life Cycle Assessment in der Automobilindustrie                                                                       |
| [20] | Jasiński et al.               | 2016 | Analytical                | A comprehensive framework for automotive sustainability assessment                                                           |
| [21] | Van Haaster et al.            | 2017 | Analytical<br>+ empirical | Development of a methodological framework for social life cycle assessment of novel technologies                             |
| [22] | Suckling and Lee              | 2017 | Empirical                 | Integrating Environmental and Social Life Cycle Assessment                                                                   |
| [23] | Lenzo et al.                  | 2017 | Analytical<br>+ empirical | Social Life Cycle Assessment in the Textile Sector: An Italian Case Study                                                    |
| [24] | Wulf et al.                   | 2017 | Analytical<br>+ empirical | Lessons Learned from a Life Cycle Sustainability Assessment of Rare Earth Permanent Magnets                                  |
| [25] | Mattioda et al.               | 2017 | Empirical                 | Social Life Cycle Assessment of Hydrogen Energy Technologies                                                                 |
| [26] | Schlör et al.                 | 2017 | Empirical                 | The social footprint of hydrogen production - A Social Life Cycle Assessment (S-LCA) of alkaline water electrolysis          |
| [27] | Mirdar Harijani et al.        | 2017 | Analytical<br>+ empirical | A multi-objective model for sustainable recycling of municipal solid waste                                                   |
| [28] | Yi Teah and Onuki             | 2017 | Empirical                 | Support Phosphorus Recycling Policy with Social Life Cycle Assessment: A Case of Japan                                       |
| [29] | Corona et al.                 | 2017 | Analytical<br>+ empirical | Social Life Cycle Assessment of a Concentrated Solar Power Plant in Spain                                                    |
| [30] | Kühnen and Hahn               | 2017 | Theoretical               | Indicators in Social Life Cycle Assessment A Review of Frameworks, Theories, and Empirical Experience                        |

|      |                               |       |                           |                                                                                                                                                                |
|------|-------------------------------|-------|---------------------------|----------------------------------------------------------------------------------------------------------------------------------------------------------------|
| [16] | Barros Telles do Carmo et al. | 2017  | Analytical<br>+ empirical | Customized scoring and weighting approaches for quantifying and aggregating results in social life cycle impact assessment                                     |
| [31] | Wang et al.                   | 2017  | Empirical                 | An analytical framework for social life cycle impact assessment—part 2: case study of labor impacts in an IC packaging company                                 |
| [32] | Tarne et al.                  | 2017  | Theoretical               | Review of Life Cycle Sustainability Assessment and Potential for Its Adoption at an Automotive Company                                                         |
| [33] | Chen and Holden               | 2017  | Empirical                 | Social life cycle assessment of average Irish dairy farm                                                                                                       |
| [34] | Cardoso et al.                | 2017  | Empirical                 | Economic, environmental, and social impacts of different sugarcane production systems                                                                          |
| [35] | Zimmer et al.                 | 2017  | Analytical<br>+ empirical | Assessing social risks of global supply chains: A quantitative analytical approach and its application to supplier selection in the German automotive industry |
| [36] | Siebert et al.                | 2018a | Analytical                | Social life cycle assessment indices and indicators to monitor the social implications of wood-based products                                                  |
| [37] | Sureau et al.                 | 2018  | Theoretical               | Social life cycle assessment frameworks: a review of criteria and indicators proposed to assess social and socioeconomic impacts                               |
| [38] | Zanchi et al.                 | 2018  | Analytical                | Analysis of the main elements affecting social LCA applications: challenges for the automotive sector                                                          |
| [39] | Souza et al.                  | 2018  | Analytical<br>+ empirical | Social life cycle assessment of first and second-generation ethanol production technologies in Brazil                                                          |
| [40] | Sousa-Zomer and Miguel        | 2018  | Empirical                 | The main challenges for social life cycle assessment (SLCA) to support the social impacts analysis of product-service systems                                  |
| [41] | Opher et al.                  | 2018  | Analytical<br>+ empirical | A comparative social life cycle assessment of urban domestic water reuse alternatives                                                                          |
| [42] | Mancini and Sala              | 2018  | Theoretical               | Social impact assessment in the mining sector: Review and comparison of indicators frameworks                                                                  |
| [43] | Siebert et al.                | 2018c | Analytical<br>+ empirical | Social life cycle assessment: in pursuit of a framework for assessing wood-based products from bioeconomy regions in Germany                                   |

|      |                        |      |                           |                                                                                                                                         |
|------|------------------------|------|---------------------------|-----------------------------------------------------------------------------------------------------------------------------------------|
| [44] | Singh and Gupta        | 2018 | Empirical                 | Social life cycle assessment in Indian steel sector: a case study                                                                       |
| [45] | Hossain et al.         | 2018 | Analytical<br>+ empirical | Development of social sustainability assessment method and a comparative case study on assessing recycled construction materials        |
| [46] | Hobson and Lynch       | 2018 | Theoretical               | Ecological modernization, techno-politics and social life cycle assessment: a view from human geography                                 |
| [47] | Arvidsson et al.       | 2018 | Empirical                 | A method for human health impact assessment in social LCA: lessons from three case studies                                              |
| [48] | Hannouf and Assefa     | 2018 | Analytical<br>+ empirical | Subcategory assessment method for social life cycle assessment: a case study of high-density polyethylene production in Alberta, Canada |
| [49] | Macombe et al.         | 2018 | Theoretical               | Preface: Social LCA in progress                                                                                                         |
| [50] | Lobsiger-Kägi et al.   | 2018 | Analytical<br>+ empirical | Social Life Cycle Assessment: Specific Approach and Case Study for Switzerland                                                          |
| [51] | Petti et al.           | 2018 | Theoretical               | Systematic literature review in social life cycle assessment                                                                            |
| [52] | Shang et al.           | 2018 | Analytical<br>+ empirical | Ontology based social life cycle assessment for product development                                                                     |
| [53] | Acrese et al.          | 2018 | Theoretical               | State of the art in S-LCA: integrating literature review and automatic text analysis                                                    |
| [54] | Ekener et al.          | 2018 | Analytical<br>+ empirical | Addressing positive impacts in social LCA – discussing current and new approaches exemplified by the case of vehicle fuels              |
| [55] | Hauschild et al.       | 2018 | Theoretical               | Social Life Cycle Assessment: An Introduction. In: Hauschild et al. 2018 Life Cycle Assessment Theory and Practice                      |
| [56] | Lucchetti et al.       | 2018 | Theoretical               | S-LCA applications: a case studies analysis                                                                                             |
| [57] | Zimdars et al.         | 2018 | Analytical<br>+ empirical | Enhancing comprehensive measurement of social impacts in S-LCA by including environmental and economic aspects                          |
| [58] | Aleisa and Al-Jarallah | 2018 | Empirical                 | A triple bottom line evaluation of solid waste management strategies: a case study for an arid Gulf State, Kuwait                       |
| [59] | Subramanian and yung   | 2018 | Theoretical               | Modeling Social Life Cycle Assessment framework for an electronic screen product e A case study of an integrated desktop computer       |

|      |                          |       |                           |                                                                                                                                                |
|------|--------------------------|-------|---------------------------|------------------------------------------------------------------------------------------------------------------------------------------------|
| [60] | McCabe and Halog         | 2018  | Theoretical               | Exploring the potential of participatory systems thinking techniques in progressing SLCA                                                       |
| [61] | Valente et al.           | 2018  | Empirical                 | Testing environmental and social indicators for biorefineries: bioethanol and biochemical production                                           |
| [62] | Siebert et al.           | 2018b | Analytical<br>+ empirical | How not to compare apples and oranges: Generate context-specific performance reference points for a social life cycle assessment model         |
| [63] | Shemfe et al.            | 2018  | Empirical                 | Social Hotspot Analysis and Trade Policy Implications of the Use of Bioelectrochemical Systems for Resource Recovery from Wastewater           |
| [64] | Russo Garrido et al.     | 2018  | Theoretical               | A literature review of type I SLCA—making the logic underlying methodological choices explicit                                                 |
| [65] | Di Cesare et al.         | 2018  | Theoretical               | Positive impacts in social life cycle assessment: state of the art and the way forward                                                         |
| [66] | Dunmade et al.           | 2018  | Empirical                 | Lifecycle Impact Assessment of an Engineering Project Management Process – a SLCA Approach                                                     |
| [67] | Grubert                  | 2018  | Theoretical               | Rigor in social life cycle assessment: improving the scientific grounding of SLCA                                                              |
| [68] | Fan et al.               | 2018  | Analytical<br>+ empirical | Evaluation for social and humanity demand on green residential districts in China based on SLCA                                                |
| [69] | Falcone and Imbert       | 2018  | Theoretical               | Social Life Cycle Approach as a Tool for Promoting the Market Uptake of Bio-Based Products from a Consumer Perspective                         |
| [70] | Iofrida et al.           | 2018a | Theoretical               | Can social research paradigms justify the diversity of approaches to social life cycle assessment?                                             |
| [71] | Iofrida et al.           | 2018b | Theoretical               | Why social life cycle assessment is struggling in development?                                                                                 |
| [72] | Dubois-Iorgulescu et al. | 2018  | Theoretical               | How to define the system in social life cycle assessments? A critical review of the state of the art and identification of needed developments |
| [73] | Cooper et al.            | 2018  | Empirical                 | Sustainability of UK shale gas in comparison with other electricity options: Current situation and future scenarios                            |
| [74] | Kühnen and Hahn          | 2018  | Theoretical               | From SLCA to Positive Sustainability Performance Measurement - A Two-Tier Delphi Study                                                         |

|      |                     |      |                           |                                                                                                                                                              |
|------|---------------------|------|---------------------------|--------------------------------------------------------------------------------------------------------------------------------------------------------------|
| [75] | Soltanpour et al.   | 2019 | Theoretical               | Area of protection in S-LCA: human well-being or societal quality                                                                                            |
| [76] | Venkatesh           | 2019 | Theoretical               | Critique of selected peer-reviewed publications on applied social life cycle assessment: focus on cases from developing countries                            |
| [77] | Shi et al.          | 2019 | Analytical<br>+ empirical | A social sustainability assessment model for manufacturing company based on S-LCA                                                                            |
| [78] | Pillain et al.      | 2019 | Analytical<br>+ empirical | Social life cycle assessment framework for evaluation of potential job creation with an application in the French carbon fiber aeronautical recycling sector |
| [79] | Prasara et al.      | 2019 | Analytical<br>+ empirical | Environmental and social life cycle assessment to enhance sustainability of sugarcane-based products in Thailand                                             |
| [80] | Croes and Vermuelen | 2019 | Analytical                | Quantification of corruption in preventative cost-based S-LCA: a contribution to the Oiconomy project                                                        |
| [81] | D'Eusanio et al.    | 2019 | Analytical<br>+ empirical | Social Life cycle Assessment of a Piece of Jewellery. Emphasis on the Local Community                                                                        |
| [82] | Dunmade             | 2019 | Analytical<br>+ empirical | Potential social lifecycle impact analysis of bioenergy from household and market wastes in African cities                                                   |
| [83] | Di Noi et al.       | 2019 | Analytical<br>+ empirical | Can S-LCA methodology support responsible sourcing of raw materials in EU policy context?                                                                    |
| [84] | Baig et al.         | 2019 | Empirical                 | Impact assessment of sanitation system on the socio-economic aspects of local community and environment in Hunza Valley Gilgit Baltistan-Pakistan            |
| [85] | Wah et al.          | 2019 | Empirical                 | Social impact evaluation of tea production using Social Life Cycle Assessments (S-LCA) method in Cameron Highlands. Pahang, Malaysia                         |
| [86] | Iofrida et al.      | 2019 | Analytical<br>+ empirical | Psychosocial risk factors' impact pathway for social life cycle assessment: an application to citrus life cycles in South Italy                              |
| [87] | Sureau et al.       | 2019 | Analytical<br>+ empirical | Participation in S-LCA: A Methodological Proposal Applied to Belgian Alternative Food Chains (Part 1)                                                        |
| [88] | Muhammad et al.     | 2019 | Empirical                 | Social implications of palm oil production through social life cycle perspectives in Johor, Malaysia                                                         |

|       |                            |       |                        |                                                                                                                                                     |
|-------|----------------------------|-------|------------------------|-----------------------------------------------------------------------------------------------------------------------------------------------------|
| [89]  | Wulf et al.                | 2019  | Theoretical            | Review of Sustainability Assessment Approaches Based on Life Cycles                                                                                 |
| [90]  | Falcone et al.             | 2019  | Theoretical            | Transitioning towards the bio-economy: Assessing the social dimension through a stakeholder lens                                                    |
| [91]  | Du et al.                  | 2019  | Empirical              | Enriching the results of screening social life cycle assessment using content analysis: a case study of sugarcane in Brazil                         |
| [92]  | Karlewski et al.           | 2019  | Empirical              | A Practical Approach for Social Life Cycle Assessment in the Automotive Industry                                                                    |
| [93]  | Zheng et al.               | 2020  | Empirical              | Modeling life-cycle social assessment in sustainable pavement management at project level                                                           |
| [94]  | Stamford                   | 2020  | Empirical              | Life cycle sustainability assessment in the energy sector                                                                                           |
| [95]  | Tokede and Traverso        | 2020  | Theoretical            | Implementing the guidelines for social life cycle assessment: past, present, and future                                                             |
| [96]  | Rafiaani et al.            | 2020a | Analytical             | Identifying Social Indicators for Sustainability Assessment of CCU Technologies: A Modified Multi-criteria Decision Making                          |
| [97]  | Rafiaani et al.            | 2020b | Empirical              | A critical view on social performance assessment at company level: social life cycle analysis of an algae case                                      |
| [98]  | Osorio-Tejada et al.       | 2020  | Empirical              | An integrated social life cycle assessment of freight transport systems                                                                             |
| [99]  | Penadés-Plà et al.         | 2020  | Analytical + empirical | Environmental and Social Impact Assessment of Optimized Post-Tensioned Concrete Road Bridges                                                        |
| [100] | Matthioda et al.           | 2020  | Theoretical            | Social life cycle assessment of biofuel production                                                                                                  |
| [101] | Herrera Almanza and Corona | 2020  | Analytical + empirical | Using Social Life Cycle Assessment to analyze the contribution of products to the Sustainable Development Goals: a case study in the textile sector |
| [102] | Gompf et al.               | 2020  | Theoretical            | Towards social life cycle assessment of mobility services: systematic literature review and the way forward                                         |
| [103] | Flor-Montalvo et al.       | 2020  | Empirical              | Social-LCA. Methodological Proposal Applied to Physical Activity Program Implementation into Old People's Routines                                  |

|       |                             |      |                        |                                                                                                                                                                                            |
|-------|-----------------------------|------|------------------------|--------------------------------------------------------------------------------------------------------------------------------------------------------------------------------------------|
| [104] | Azimi et al.                | 2020 | Empirical              | Social Life cycle Assessment of Household Waste Management System in Kabul City                                                                                                            |
| [105] | Ramos Huarachi et al.       | 2020 | Theoretical            | Past and future of Social Life Cycle Assessment: Historical evolution and research trends                                                                                                  |
| [106] | Endres et al.               | 2020 | Theoretical            | Sozioökonomische Nachhaltigkeitsbewertung in: Endres et al. 2020 Biokunststoffe unter dem Blickwinkel der Nachhaltigkeit und Kommunikation Status quo, Möglichkeiten und Herausforderungen |
| [107] | Sureau et al.               | 2020 | Theoretical            | Different paths in social life cycle impact assessment (S-LCIA)—a classification of type II impact pathway approaches                                                                      |
| [108] | Jarosch et al.              | 2020 | Analytical + empirical | A Regional Socio-Economic Life Cycle Assessment of a Bioeconomy Value Chain                                                                                                                |
| [109] | Arvidsson Segerkvist et al. | 2020 | Theoretical            | Research on Environmental, Economic, and Social Sustainability in Dairy Farming: A Systematic Mapping of Current Literature                                                                |
| [110] | Naghshineh et al.           | 2020 | Analytical + empirical | A Social Life Cycle Assessment Framework for Additive Manufacturing Products                                                                                                               |
| [111] | Barke et al.                | 2020 | Analytical             | Socio-economic life cycle assessment of future aircraft systems                                                                                                                            |

**Table S3.** List of S-LCA studies related to the automotive industry (2013-2020)

| Ref  | Authors         | Year | Approach               | Title                                                                                                                                                          |
|------|-----------------|------|------------------------|----------------------------------------------------------------------------------------------------------------------------------------------------------------|
| [1]  | Baumann et al.  | 2013 | Empirical              | Does the Production of an Airbag Injure more People than the Airbag Saves in Traffic?                                                                          |
| [19] | Karlewski       | 2016 | Analytical + Empirical | Social Life Cycle Assessment in der Automobilindustrie                                                                                                         |
| [20] | Jasiński et al. | 2016 | Analytical             | A comprehensive framework for automotive sustainability assessment                                                                                             |
| [32] | Tarne et al.    | 2017 | Theoretical            | Review of Life Cycle Sustainability Assessment and Potential for Its Adoption at an Automotive Company                                                         |
| [35] | Zimmer et al.   | 2017 | Analytical + Empirical | Assessing social risks of global supply chains: A quantitative analytical approach and its application to supplier selection in the German automotive industry |
| [38] | Zanchi et al.   | 2018 | Analytical             | Analysis of the main elements affecting social LCA applications: challenges for the automotive sector                                                          |
| [54] | Ekener et al.   | 2018 | Analytical + Empirical | Addressing positive impacts in social LCA—discussing current and new approaches exemplified by the case of vehicle fuels                                       |

|       |                  |      |                         |                                                                                                             |
|-------|------------------|------|-------------------------|-------------------------------------------------------------------------------------------------------------|
| [77]  | Shi et al.       | 2019 | Analytical<br>Empirical | A social sustainability assessment model for manufacturing company based on S-LCA                           |
| [92]  | Karlewski et al. | 2019 | Empirical               | A Practical Approach for Social Life Cycle Assessment in the Automotive Industry                            |
| [102] | Gompf et al.     | 2020 | Theoretical             | Towards social life cycle assessment of mobility services: systematic literature review and the way forward |

## References

- [1] Baumann, H., Arvidsson, R., Tong, H., and Wang, Y. Does the Production of an Airbag Injure more People than the Airbag Saves in Traffic? **2013**. *Journal of Industrial Ecology* 17, 4, 517–527.
- [2] Chhipi-Shrestha, G. K., Hewage, K., and Sadiq, R. ‘Socializing’ sustainability. A critical review on current development status of social life cycle impact assessment method. **2015**. *Clean Techn Environ Policy* 17, 3, 579–596.
- [3] Martínez-Blanco, J., Lehmann, A., Chang, Y.-J., and Finkbeiner, M. Social organizational LCA (SOLCA)—a new approach for implementing social LCA. **2015**. *Int J Life Cycle Assess* 20, 11, 1586–1599.
- [4] Ren, J., Manzardo, A., Mazzi, A., Zuliani, F., and Scipioni, A. Prioritization of bioethanol production pathways in China based on life cycle sustainability assessment and multicriteria decision-making. **2015**. *Int J Life Cycle Assess* 20, 6, 842–853.
- [5] Umair, S., Björklund, A., and Petersen, E. E. Social impact assessment of informal recycling of electronic ICT waste in Pakistan using UNEP SETAC guidelines. **2015**. *Resources, Conservation and Recycling* 95, 1, 46–57.
- [6] Karklina, K., Slisane, D., Romagnoli, F., and Blumberga, D. Social life cycle assessment of biomethane production and distribution in Latvia. **2015**. *ETR* 2, 128.
- [7] Luca, A. I. de, Iofrida, N., Strano, A., Falcone, G., and Gulisano, G. Social life cycle assessment and participatory approaches: A methodological proposal applied to citrus farming in Southern Italy. **2015**. *Integrated environmental assessment and management* 11, 3, 383–396.
- [8] Dong, Y. H. and Ng, S. T. A social life cycle assessment model for building construction in Hong Kong. **2015**. *Int J Life Cycle Assess* 20, 8, 1166–1180.
- [9] Mattioda, R. A., Mazzi, A., Canciglieri, O., and Scipioni, A. Determining the principal references of the social life cycle assessment of products. **2015**. *Int J Life Cycle Assess* 20, 8, 1155–1165.
- [10] Di Cesare, S., Silveri, F., and Petti, L. Positive impacts and Indicator Categories in Social Life Cycle Assessment. Results from a systematic review. In *Social Life Cycle Assessment - State of the art and challenges for supporting product policies (pp.46-53)*. Publisher European Commission Joint Research Centre, Institut for Environment and Sustainability. Publications Office of the European Union. **2015**, S. Sala, Vasta Aloessandro, L. Mancini, J. Dewulf and Rosenbaum Eckehard, Eds., 46–52. DOI=10.2788/253715.
- [11] Dewulf, J., Mancini, L., Blengini, G. A., Sala, S., Latunussa, C., and Pennington, D. Toward an Overall Analytical Framework for the Integrated Sustainability Assessment of the Production and Supply of Raw Materials and Primary Energy Carriers. **2015**. *Journal of Industrial Ecology* 19, 6, 963–977.
- [12] Bocoum, I., Macombe, C., and Révéret, J.-P. Anticipating impacts on health based on changes in income inequality caused by life cycles. **2015**. *Int J Life Cycle Assess* 20, 3, 405–417.
- [13] Kim, W., Jun, H. M., Walker, M., and Drane, D. Evaluating the perceived social impacts of hosting large-scale sport tourism events. Scale development and validation. **2015**. *Tourism Management* 48, 4, 21–32.
- [14] Musaaazi, M. K., Mechtenberg, A. R., Nakibuule, J., Sensenig, R., Miyingo, E., Makanda, J. V., Hakimian, A., and Eckelman, M. J. Quantification of social equity in life cycle assessment for increased sustainable production of sanitary products in Uganda. **2015**. *Journal of Cleaner Production* 96, 569–579.
- [15] Dunmade I.S., Loto, C. O., Onawumi, A. S., and Oyawule, F. **2016**. *A social lifecycle assessment model for sachet water production in Nigeria*. 3rd International Conference on African Development Issues (CU-ICADI 2016), Covenant University Press.
- [16] Barros Telles do Carmo, Breno, Margni, M., and Baptiste, P. Social impacts profile of suppliers. A S-LCA approach. **2016**. *IFAC-PapersOnLine* 49, 2, 36–41.
- [17] Thorstensen, E. and Forsberg, E.-M. Social Life Cycle Assessment as a resource for Responsible Research and Innovation. **2016**. *Journal of Responsible Innovation* 3, 1, 50–72.

- [18] Wang, S.-W., Hsu, C.-W., and Hu, A. H. An analytic framework for social life cycle impact assessment—part 1. Methodology. **2016**. *Int J Life Cycle Assess* 21, 10, 1514–1528.
- [19] Karlewski, H. **2016**. *Social Life Cycle Assessment in der Automobilindustrie*. Technischen Universität Berlin, Berlin. DOI=10.14279/depositonce-4974.
- [20] Jasiński, D., Meredith, J., and Kirwan, K. A comprehensive framework for automotive sustainability assessment. **2016**. *Journal of Cleaner Production* 135, 2, 1034–1044.
- [21] van Haaster, B., Citroth, A., Fontes, J., Wood, R., and Ramirez, A. Development of a methodological framework for social life-cycle assessment of novel technologies. **2017**. *Int J Life Cycle Assess* 22, 3, 423–440.
- [22] Suckling, J. R. and Lee, J. Integrating Environmental and Social Life Cycle Assessment. Asking the Right Question. **2017**. *Journal of Industrial Ecology* 21, 6, 1454–1463.
- [23] Lenzo, P., Traverso, M., Salomone, R., and Ioppolo, G. Social Life Cycle Assessment in the Textile Sector. An Italian Case Study. **2017**. *Sustainability* 9, 11, 2092.
- [24] Wulf, C., Zapp, P., Schreiber, A., Marx, J., and Schlör, H. Lessons Learned from a Life Cycle Sustainability Assessment of Rare Earth Permanent Magnets. **2017**. *Journal of Industrial Ecology* 21, 6, 1578–1590.
- [25] Mattioda, R. A., Fernandes, P. T., Casela, J. L., and Canciglieri, O. J. Chapter 7. Social Life Cycle Assessment of Hydrogen Energy Technologies, Hydrogen Economy, 171–188.
- [26] Schlör, H., Koj, J., Zapp, P., Schreiber, A., and Hake, J.-F. The Social Footprint of Hydrogen Production - A Social Life Cycle Assessment (S-LCA) of Alkaline Water Electrolysis. **2017**. *Energy Procedia* 105, 3038–3044.
- [27] Mirdar Harijani, A., Mansour, S., and Karimi, B. A multi-objective model for sustainable recycling of municipal solid waste. **2017**. *Waste management & research : the journal of the International Solid Wastes and Public Cleansing Association, ISWA* 35, 4, 387–399.
- [28] Yi Teah, H. and Onuki, M. Support Phosphorus Recycling Policy with Social Life Cycle Assessment. A Case of Japan. **2017**. *Sustainability* 9, 7, 1223.
- [29] Corona, B., Bozhilova-Kisheva, K. P., Olsen, S. I., and San Miguel, G. Social Life Cycle Assessment of a Concentrated Solar Power Plant in Spain. A Methodological Proposal. **2017**. *Journal of Industrial Ecology* 21, 6, 1566–1577.
- [30] Kühnen, M. and Hahn, R. Indicators in Social Life Cycle Assessment. A Review of Frameworks, Theories, and Empirical Experience. **2017**. *Journal of Industrial Ecology* 21, 6, 1547–1565.
- [31] Wang, S.-W., Hsu, C.-W., and Hu, A. H. An analytical framework for social life cycle impact assessment—part 2. Case study of labor impacts in an IC packaging company. **2017**. *Int J Life Cycle Assess* 22, 5, 784–797.
- [32] Tarne, P., Traverso, M., and Finkbeiner, M. Review of Life Cycle Sustainability Assessment and Potential for Its Adoption at an Automotive Company. **2017**. *Sustainability* 9, 4, 670.
- [33] Chen, W. and Holden, N. M. Social life cycle assessment of average Irish dairy farm. **2017**. *Int J Life Cycle Assess* 22, 9, 1459–1472.
- [34] Cardoso, T. F., Watanabe, M. D. B., Souza, A., Chagas, M. F., Cavalett, O., Morais, E. R., Nogueira, L. A., Leal, M. L., Braunbeck, O. A., Cortez, Luis A.B., and Cortez, A. Economic, environmental, and social impacts of different sugarcane production systems. **2017**.
- [35] Zimmer, K., Fröhling, M., Breun, P., and Schultmann, F. Assessing social risks of global supply chains. A quantitative analytical approach and its application to supplier selection in the German automotive industry. **2017**. *Journal of Cleaner Production* 149, 6, 96–109.
- [36] Siebert, A., Bezama, A., O’Keeffe, S., and Thrän, D. Social life cycle assessment indices and indicators to monitor the social implications of wood-based products. **2018**. *Journal of Cleaner Production* 172, 4, 4074–4084.
- [37] Sureau, S., Mazijn, B., Garrido, S. R., and Achten, W. M. J. Social life-cycle assessment frameworks. A review of criteria and indicators proposed to assess social and socioeconomic impacts. **2018**. *Int J Life Cycle Assess* 23, 4, 904–920.
- [38] Zanchi, L., Delogu, M., Zamagni, A., and Pierini, M. Analysis of the main elements affecting social LCA applications. Challenges for the automotive sector. **2018**. *Int J Life Cycle Assess* 23, 3, 519–535.
- [39] Souza, A., Watanabe, M. D. B., Cavalett, O., Ugaya, C. M. L., and Bonomi, A. Social life cycle assessment of first and second-generation ethanol production technologies in Brazil. **2018**. *Int J Life Cycle Assess* 23, 3, 617–628.
- [40] Sousa-Zomer, T. T. and Cauchick Miguel, P. A. The main challenges for social life cycle assessment (SLCA) to support the social impacts analysis of product-service systems. **2018**. *Int J Life Cycle Assess* 23, 3, 607–616.

- [41] Opher, T., Shapira, A., and Friedler, E. A comparative social life cycle assessment of urban domestic water reuse alternatives. **2018.** *Int J Life Cycle Assess* 23, 6, 1315–1330.
- [42] Mancini, L. and Sala, S. Social impact assessment in the mining sector. Review and comparison of indicators frameworks. **2018.** *Resources Policy* 57, 2, 98–111.
- [43] Siebert, A., Bezama, A., O’Keeffe, S., and Thrän, D. Social life cycle assessment. In pursuit of a framework for assessing wood-based products from bioeconomy regions in Germany. **2018.** *Int J Life Cycle Assess* 23, 3, 651–662.
- [44] Singh, R. K. and Gupta, U. Social life cycle assessment in Indian steel sector. A case study. **2018.** *Int J Life Cycle Assess* 23, 4, 921–939.
- [45] Hossain, M. U., Poon, C. S., Dong, Y. H., Lo, I. M. C., and Cheng, J. C. P. Development of social sustainability assessment method and a comparative case study on assessing recycled construction materials. **2018.** *Int J Life Cycle Assess* 23, 8, 1654–1674.
- [46] Hobson, K. and Lynch, N. Ecological modernization, techno-politics and social life cycle assessment. A view from human geography. **2018.** *Int J Life Cycle Assess* 23, 3, 456–463.
- [47] Arvidsson, R., Hildenbrand, J., Baumann, H., Islam, K. M. N., and Parsmo, R. A method for human health impact assessment in social LCA. Lessons from three case studies. **2018.** *Int J Life Cycle Assess* 23, 3, 690–699.
- [48] Hannouf, M. and Assefa, G. Subcategory assessment method for social life cycle assessment. A case study of high-density polyethylene production in Alberta, Canada. **2018.** *Int J Life Cycle Assess* 23, 1, 116–132.
- [49] Macombe, C., Zamagni, A., and Traverso, M. Preface: Social LCA in progress. **2018.** *Int J Life Cycle Assess* 23, 3, 387–393.
- [50] Lobsiger-Kägi, E., López, L., Kuehn, T., Roth, R., Carabias, V., and Zipper, C. Social Life Cycle Assessment. Specific Approach and Case Study for Switzerland. **2018.** *Sustainability* 10, 12, 4382.
- [51] Petti, L., Serreli, M., and Di Cesare, S. Systematic literature review in social life cycle assessment. **2018.** *Int J Life Cycle Assess* 23, 3, 422–431.
- [52] Shang, Z., Wang, M., Su, D., Liu, Q., and Zhu, S. Ontology based social life cycle assessment for product development. **2018.** *Advances in Mechanical Engineering* 10, 11, 168781401881227.
- [53] Arcese, G., Lucchetti, M. C., Massa, I., and Valente, C. State of the art in S-LCA. Integrating literature review and automatic text analysis. **2018.** *Int J Life Cycle Assess* 23, 3, 394–405.
- [54] Ekener, E., Hansson, J., and Gustavsson, M. Addressing positive impacts in social LCA—discussing current and new approaches exemplified by the case of vehicle fuels. **2018.** *Int J Life Cycle Assess* 23, 3, 556–568.
- [55] Hauschild, M. Z., Rosenbaum, R. K., and Olsen, S. I. *Life Cycle Assessment*. **2018.** Springer International Publishing, Cham.
- [56] Lucchetti, M. C., Arcese, G., Traverso, M., Montauti, C., and Herdiansyah, H. S-LCA applications. A case studies analysis. **2018.** *E3S Web Conf.* 74, 7, 10009.
- [57] Zimdars, C., Haas, A., and Pfister, S. Enhancing comprehensive measurement of social impacts in S-LCA by including environmental and economic aspects. **2018.** *Int J Life Cycle Assess* 23, 1, 133–146.
- [58] Aleisa, E. and Al-Jarallah, R. A triple bottom line evaluation of solid waste management strategies. A case study for an arid Gulf State, Kuwait. **2018.** *Int J Life Cycle Assess* 23, 7, 1460–1475.
- [59] Subramanian, K. and Yung, W. K. Modeling Social Life Cycle Assessment framework for an electronic screen product – A case study of an integrated desktop computer. **2018.** *Journal of Cleaner Production* 197, 2, 417–434.
- [60] McCabe, A. and Halog, A. Exploring the potential of participatory systems thinking techniques in progressing SLCA. **2018.** *Int J Life Cycle Assess* 23, 3, 739–750.
- [61] Valente, C., Brekke, A., and Modahl, I. S. Testing environmental and social indicators for biorefineries. Bioethanol and biochemical production. **2018.** *Int J Life Cycle Assess* 23, 3, 581–596.
- [62] Siebert, A., O’Keeffe, S., Bezama, A., Zeug, W., and Thrän, D. How not to compare apples and oranges. Generate context-specific performance reference points for a social life cycle assessment model. **2018.** *Journal of Cleaner Production* 198, 4, 587–600.
- [63] Shemfe, M., Gadkari, S., and Sadhukhan, J. Social Hotspot Analysis and Trade Policy Implications of the Use of Bioelectrochemical Systems for Resource Recovery from Wastewater. **2018.** *Sustainability* 10, 9, 3193.
- [64] Russo Garrido, S., Parent, J., Beaulieu, L., and Révéré, J.-P. A literature review of type I SLCA—making the logic underlying methodological choices explicit. **2018.** *Int J Life Cycle Assess* 23, 3, 432–444.
- [65] Di Cesare, S., Silveri, F., Sala, S., and Petti, L. Positive impacts in social life cycle assessment. State of the art and the way forward. **2018.** *Int J Life Cycle Assess* 23, 3, 406–421.

- [66] Dunmade, I., Udo, M., Akintayo, T., Oyedepo, S., and Okokpujie, I. P. Lifecycle Impact Assessment of an Engineering Project Management Process – a SLCA Approach. **2018.** *IOP Conf. Ser.: Mater. Sci. Eng.* 413, 1–14.
- [67] Grubert, E. Rigor in social life cycle assessment. Improving the scientific grounding of SLCA. **2018.** *Int J Life Cycle Assess* 23, 3, 481–491.
- [68] Fan, L., Pang, B., Zhang, Y., Zhang, X., Sun, Y., and Wang, Y. Evaluation for social and humanity demand on green residential districts in China based on SLCA. **2018.** *Int J Life Cycle Assess* 23, 3, 640–650.
- [69] Falcone, P. and Imbert, E. Social Life Cycle Approach as a Tool for Promoting the Market Uptake of Bio-Based Products from a Consumer Perspective. **2018.** *Sustainability* 10, 4, 1031.
- [70] Iofrida, N., Luca, A. I. de, Strano, A., and Gulisano, G. Can social research paradigms justify the diversity of approaches to social life cycle assessment? **2018.** *Int J Life Cycle Assess* 23, 3, 464–480.
- [71] Iofrida, N., Strano, A., Gulisano, G., and Luca, A. I. de. Why social life cycle assessment is struggling in development? **2018.** *Int J Life Cycle Assess* 23, 2, 201–203.
- [72] Dubois-Iorgulescu, A.-M., Saraiva, A. K. E. B., Valle, R., and Rodrigues, L. M. How to define the system in social life cycle assessments? A critical review of the state of the art and identification of needed developments. **2018.** *Int J Life Cycle Assess* 23, 3, 507–518.
- [73] Cooper, J., Stamford, L., and Azapagic, A. Sustainability of UK shale gas in comparison with other electricity options: Current situation and future scenarios. **2018.** *The Science of the total environment* 619–620, 804–814.
- [74] Kühnen, M. and Hahn, R. From SLCA to Positive Sustainability Performance Measurement. A Two-Tier Delphi Study. **2018.** *Journal of Industrial Ecology* 23, 3, 615–634.
- [75] Soltanpour, Y., Peri, I., and Temri, L. Area of protection in S-LCA. Human well-being or societal quality. **2019.** *Int J Life Cycle Assess* 24, 11, 2073–2087.
- [76] Venkatesh, G. Critique of selected peer-reviewed publications on applied social life cycle assessment. Focus on cases from developing countries. **2019.** *Clean Techn Environ Policy* 21, 2, 413–430.
- [77] Shi, J., Wang, Y., Ma, Q., Fan, S., Jin, H., Liu, H., and Liu, H. A social sustainability assessment model for manufacturing company based on S-LCA. **2019.** *Int. J. SDP* 14, 02, 172–182.
- [78] Pillain, B., Viana, L. R., Lefevre, A., Jacquemin, L., and Sonnemann, G. Social life cycle assessment framework for evaluation of potential job creation with an application in the French carbon fiber aeronautical recycling sector. **2019.** *Int J Life Cycle Assess* 24, 9, 1729–1742.
- [79] Prasara, J., Gheewala, S. H., Silalertruksa, T., Pongpat, P., and Sawaengsak, W. Environmental and social life cycle assessment to enhance sustainability of sugarcane-based products in Thailand. **2019.** *Clean Techn Environ Policy* 21, 7, 1447–1458.
- [80] Croes, P. R. and Vermeulen, W. J. V. Quantification of corruption in preventative cost-based S-LCA: a contribution to the Oiconomy project. **2019.** *The international journal of life cycle assessment* 24, 1, 142–159.
- [81] D'Eusanio, M., Serreli, M., and Petti, L. Social Life-Cycle Assessment of a Piece of Jewellery. Emphasis on the Local Community. **2019.** *Resources* 8, 4, 158.
- [82] Dunmade, I. S. Potential social lifecycle impact analysis of bioenergy from household and market waste in African cities. **2019.** *Agronomy Research* 4, 17, 1599–1616.
- [83] Di Noi, C., Ciroth, A., Mancini, L., Eynard, U., Pennington, D., and Blengini, G. A. Can S-LCA methodology support responsible sourcing of raw materials in EU policy context? **2020.** *Int J Life Cycle Assess* 25, 2, 332–349.
- [84] Baig, F., Nawab, B., and Mahmood, Q. Impact assessment of sanitation system on the socio-economic aspects of local community and environment in Hunza Valley Gilgit Baltistan-Pakistan. **2019.** *Int J Energ Water Res* 3, 2, 73–79.
- [85] Wah, Y. G., Muhammad, K. I., and Sharaai, A. H. Social Impact Evaluation of tea production using social life cycle assessment (S-LCA) method in Cameron Highlands, Pahang, Malaysia. **2019.** *Journal of the Malaysian Institute of Planners* 17, 2, 215–224.
- [86] Iofrida, N., Luca, A. I. de, Silveri, F., Falcone, G., Stillitano, T., Gulisano, G., and Strano, A. Psychosocial risk factors' impact pathway for social life cycle assessment. An application to citrus life cycles in South Italy. **2019.** *Int J Life Cycle Assess* 24, 4, 767–780.
- [87] Sureau, Lohest, van Mol, Bauler, and Achten. Participation in S-LCA. A Methodological Proposal Applied to Belgian Alternative Food Chains (Part 1). **2019.** *Resources* 8, 4, 160.
- [88] Muhammad, K. I., Sharaai, A. H., Ismail, M. M., Harun, R., and Yien, W. S. Social implications of palm oil production through social life cycle perspectives in Johor, Malaysia. **2019.** *Int J Life Cycle Assess* 24, 5, 935–944.
- [89] Wulf, C., Werker, J., Ball, C., Zapp, P., and Kuckshinrichs, W. Review of Sustainability Assessment Approaches Based on Life Cycles. **2019.** *Sustainability* 11, 20, 5717.

- [90] Falcone, P. M., González García, S., Imbert, E., Lijó, L., Moreira, M. T., Tani, A., Tartiu, V. E., and Morone, P. Transitioning towards the bio-economy. Assessing the social dimension through a stakeholder lens. **2019.** *Corp Soc Resp Env Ma* 26, 5, 1135–1153.
- [91] Du, C., Ugaya, C., Freire, F., Dias, L. C., and Clift, R. Enriching the results of screening social life cycle assessment using content analysis. A case study of sugarcane in Brazil. **2019.** *Int J Life Cycle Assess* 24, 4, 781–793.
- [92] Karlewski, Lehmann, Ruhland, and Finkbeiner. A Practical Approach for Social Life Cycle Assessment in the Automotive Industry. **2019.** *Resources* 8, 3, 146.
- [93] Zheng, X., Easa, S. M., Ji, T., and Jiang, Z. Modeling life-cycle social assessment in sustainable pavement management at project level. **2020.** *Int J Life Cycle Assess* 25, 6, 1106–1118.
- [94] Stamford, L. Chapter 5 - Life cycle sustainability assessment in the energy sector. In *Biofuels for a More Sustainable Future*. **2020**, J. Ren, A. Scipioni, A. Manzardo and H. Liang, Eds. Elsevier Inc., 115–163. DOI=10.1016/B978-0-12-815581-3.00005-1.
- [95] Tokede, O. and Traverso, M. Implementing the guidelines for social life cycle assessment. Past, present, and future. **2020.** *Int J Life Cycle Assess* 25, 10, 1910–1929.
- [96] Rafiaani, P., Dikopoulou, Z., van Dael, M., Kuppens, T., Azadi, H., Lebailly, P., and van Passel, S. Identifying Social Indicators for Sustainability Assessment of CCU Technologies. A Modified Multi-criteria Decision Making. **2020.** *Soc Indic Res* 147, 1, 15–44.
- [97] Rafiaani, P., Kuppens, T., Thomassen, G., van Dael, M., Azadi, H., Lebailly, P., and van Passel, S. A critical view on social performance assessment at company level. Social life cycle analysis of an algae case. **2020.** *Int J Life Cycle Assess* 25, 2, 363–381.
- [98] Osorio-Tejada, J. L., Llera-Sastresa, E., Scarpellini, S., and Hashim, A. H. An integrated social life cycle assessment of freight transport systems. **2020.** *Int J Life Cycle Assess* 25, 6, 1088–1105.
- [99] Penadés-Plà, V., Martínez-Muñoz, D., García-Segura, T., Navarro, I. J., and Yepes, V. Environmental and Social Impact Assessment of Optimized Post-Tensioned Concrete Road Bridges. **2020.** *Sustainability* 12, 10, 4265.
- [100] Mattioda, R. A., Tavares, D. R., Casela, J. L., and Canciglieri, O. J. Chapter 9 - Social life cycle assessment of biofuel production. In *Biofuels for a More Sustainable Future*. **2020**, J. Ren, A. Scipioni, A. Manzardo and H. Liang, Eds. Elsevier Inc., 255–271. DOI=10.1016/B978-0-12-815581-3.00009-9.
- [101] Herrera Almanza, A. M. and Corona, B. Using Social Life Cycle Assessment to analyze the contribution of products to the Sustainable Development Goals. A case study in the textile sector. **2020.** *Int J Life Cycle Assess* 25, 9, 1833–1845.
- [102] Gompf, K., Traverso, M., and Hetterich, J. Towards social life cycle assessment of mobility services. Systematic literature review and the way forward. **2020.** *Int J Life Cycle Assess* 25, 10, 1883–1909.
- [103] Flor-Montalvo, F. J., García-Alcaraz, J. L., Sánchez-Toledo Ledesma, A., and Álvarez-Kurogi, L. Social-LCA. Methodological Proposal Applied to Physical Activity Program Implementation into Old People's Routines. **2020.** *Sustainability* 12, 12, 4965.
- [104] Azimi, A. N., Dente, S. M. R., and Hashimoto, S. Social Life-Cycle Assessment of Household Waste Management System in Kabul City. **2020.** *Sustainability* 12, 8, 3217.
- [105] Ramos Huarachi, D. A., Piekarski, C. M., Puglieri, F. N., and Francisco, A. C. de. Past and future of Social Life Cycle Assessment. Historical evolution and research trends. **2020.** *Journal of Cleaner Production* 264, 121506.
- [106] Endres, H.-J., Mudersbach, M., and Behnsen, H. *Biokunststoffe unter dem Blickwinkel der Nachhaltigkeit und Kommunikation. Status quo, Möglichkeiten und Herausforderungen*. **2020.** Springer Fachmedien Wiesbaden GmbH, Wiesbaden, Germany.
- [107] Sureau, S., Neugebauer, S., and Achten, W. M. J. Different paths in social life cycle impact assessment (S-LCIA)—a classification of type II impact pathway approaches. **2020.** *Int J Life Cycle Assess* 25, 2, 382–393.
- [108] Jarosch, L., Zeug, W., Bezama, A., Finkbeiner, M., and Thrän, D. A Regional Socio-Economic Life Cycle Assessment of a Bioeconomy Value Chain. **2020.** *Sustainability* 12, 3, 1259.
- [109] Arvidsson Segerkvist, K., Hansson, H., Sonesson, U., and Gunnarsson, S. Research on Environmental, Economic, and Social Sustainability in Dairy Farming. A Systematic Mapping of Current Literature. **2020.** *Sustainability* 12, 14, 5502.
- [110] Naghshineh, B., Lourenço, F., Godina, R., Jacinto, C., and Carvalho, H. A Social Life Cycle Assessment Framework for Additive Manufacturing Products. **2020.** *Applied Sciences* 10, 13, 4459.
- [111] Barke, A., Thies, C., Melo, S. P., Cerdas, F., Herrmann, C., and Spengler, T. S. Socio-economic life cycle assessment of future aircraft systems. **2020.** *Procedia CIRP* 90, 6, 262–267.

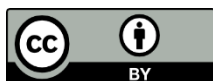

© 2021 by the authors. Submitted for possible open access publication under the terms and conditions of the Creative Commons Attribution (CC BY) license (<http://creativecommons.org/licenses/by/4.0/>).
